# Supplementary material
Source: PubMed Central journal article supplement (PMC5354505)
Supplement: 10.1074_M116.764340_jbc.M116.764340-1.pdf [file 10.1074_M116.764340_jbc.M116.764340-1.pdf]

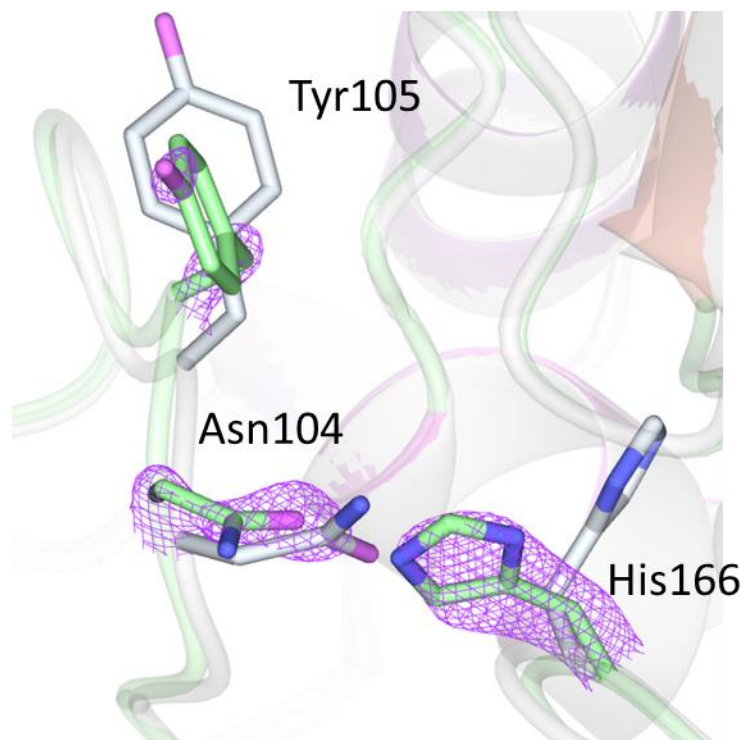

Supplemental Figure SF1. Conformational changes for Asn104 and Tyr105 in the ES\*-acylation structure. Glu166His with the “flipped-out” conformation forms H-bond with Asn104. Tyr105 becomes more flexible as indicated by the electron density. Fo-Fc omit map (purple) is drawn in mesh format and contoured at 2.0  $\sigma$ .
